# Supplementary material for: Control of Escherichia coli in Fresh-Cut Mixed Vegetables Using a Combination of Bacteriophage and Carvacrol
Source: MDPI journal article supplement (doi:10.3390/antibiotics12111579), 2023-10-30
Supplement: s1 [file s1]

## Supplementary Materials

Table S1: The efficiency of plating (EOP) of isolated coliphages against 13 *Escherichia* strains and five *Salmonella* strains.  $EOP \geq 0.5$ , high efficiency;  $0.5 > EOP \geq 0.1$ , medium efficiency;  $EOP \leq 0.1$ , low efficiency; H, primary host.

|                             | SUT_E420 | SUT_E520 | SUT_E1520 | SUT_E1620 |
|-----------------------------|----------|----------|-----------|-----------|
| <b>Bacteria</b>             |          |          |           |           |
| <i>E. coli</i> ATC25922     | -        | -        | -         | <0.001    |
| <i>E. coli</i> K12          | 0.66     | 0.67     | H         | H         |
| <i>E. coli</i> G106         | 0.74     | 0.73     | 0.44      | <0.001    |
| <i>E. coli</i> G131         | 0.69     | 0.92     | 0.91      | 0.58      |
| <i>E. coli</i> O157:H7      | H        | H        | -         | 0.25      |
| <i>E. coli</i> O113:H21     | -        | -        | 0.03      | -         |
| <i>E. coli</i> O130:H11     | -        | -        | -         | -         |
| <i>E. coli</i> O15          | -        | -        | -         | <0.001    |
| <i>E. coli</i> O26:H11      | <0.001   | -        | -         | -         |
| <i>E. coli</i> O127:H6      | -        | -        | -         | <0.001    |
| <i>E. coli</i> O119         | -        | -        | -         | <0.001    |
| <i>E. coli</i> O142:H6      | -        | -        | -         | <0.001    |
| <i>E. coli</i> O55:H7       | 0.001    | <0.001   | -         | <0.001    |
| <i>Salmonella</i> Hofit     | -        | -        | -         | <0.001    |
| <i>Salmonella</i> Typhi     | -        | -        | -         | 0.26      |
| <i>Salmonella</i> Paratyphi | -        | -        | -         | <0.001    |
| <i>S.e.s</i> Newport        | -        | <0.001   | -         | -         |
| <i>S.e.s</i> Choleraesuis   | -        | <0.001   | -         | 0.02      |

*S.e.s*: *Salmonella enterica* serovar
